# Supplementary material for: Pyroptosis burden is associated with anti-TNF treatment outcome in inflammatory bowel disease: new insights from bioinformatics analysis
Source: PubMed Central journal article supplement (PMC10516897; doi:10.1038/s41598-023-43091-0), 2023-09-22

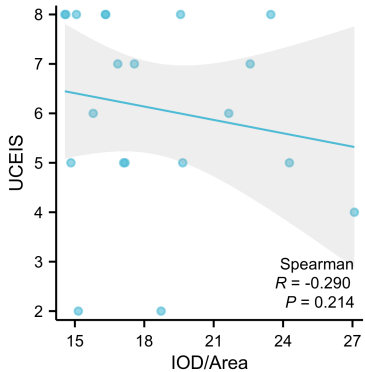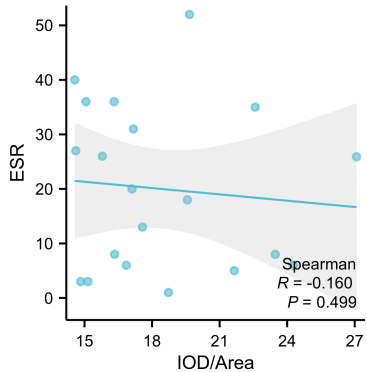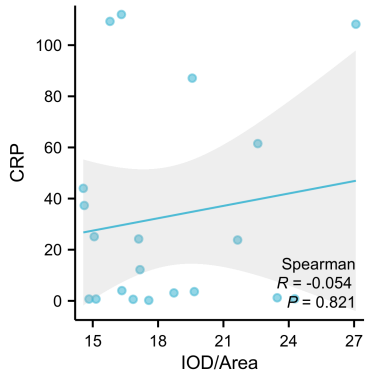

Supplement: 41598_2023_43091_MOESM3_ESM.pdf [file 41598_2023_43091_MOESM3_ESM.pdf]
